# Supplementary material for: Immune Attack players perform better on a test of cellular immunology and self confidence than their classmates who play a control video game
Source: Royal Society of Chemistry journal article supplement (doi:10.1039/c4fd00014e), 2014-01-01
Supplement: c4fd00014e2.xlsx [file c4fd00014e2.xlsx]

## Sheet: Sheet1
Knowledge	Knowledge	Knowledge	Knowledge	Knowledge	Knowledge	Knowledge	Knowledge	Knowledge	Knowledge	Knowledge
12: What kind of cell is this?	13: Which cells are the first to respond to a bacterial infection?	16: When a white blood cell leaves the blood stream what is the process called?	17: Of the things listed below, which is the first line of defenses the body employs against potential pathogens?	18: Transmigration of Monocytes (white blood cells) is a multi-step process. Please refer to the picture above, and choose the answer that lists the steps in the correct order.	19: What is C3a (cytokine)?	27: What is the name of the protein that will make a slowed Monocyte come to a stop?	29: What is the name of the protein that will make a monocyte slow down?	30: How do cells of the immune system get to the site of an infection?	31: What role do Macrophages play when the immune system is fighting an infection?	34: To fight an infection, white blood cells must reach the site of infection. Which answer choice below correctly orders the stages and processes that the white blood cell goes through to reach the infection site and fight the bacteria.																					22: I would be able to understand this diagram if I read it and thought about it.	23: I would be able to understand this diagram if I read it and thought about it.	24: I would be able to understand this diagram if I read it and thought about it.	25: I would be able to understand this diagram if I read it and thought about it.	26: I would be able to understand this diagram if I read it and thought about it.									89: What color were the Monocytes in the Game Immune Attack?	90: What is the arrow pointing to?	91: What color were the Pseudomonas bacteria in the game Immune Attack?	92: In the above picture, what is the arrow pointing to?	93: What color are were the Neutrophils in the game Immune Attack?	94: In the above picture, what is the arrow pointing to?
Amoeba	White blood cells generally respond at the same time.	Transvessel movement	Antibodies	C, B, D, A	C3a is an chemical signal produced by B-Cells.	Selectin	Pseudomonas	They are brought to the infection by the carrier proteins on red blood cells.	Macrophages activate carrier proteins on Red Blood Cells.	phagocytosis, Monocyte, transmigration, Macrophage																																		Green	Something that will damage your ship.	Blue	An amino acid	Yellow	A protein that stops Monocytes.
Bacteria cell	B-Cells	Transportation	T-Cells	A, D, B, C	C3a is a by-product of antibiotic metabolism.	Peptin	ICAM	They circulate randomly and then diffuse to the infection.	Macrophages activate the liver which filters bacteria from the bloodstream.	Macrophage, Monocyte, phagocytosis, transmigration																																		Yellow	A wiggly thing that is the wrong target.	Yellow	A lipid	Blue	A protein that makes Monocytes exit the blood vessel.
A skin cell	T-Cells	Transferrance	Platelets	D, A, B, C	C3a is a signal used by Macrophages to alert Red Blood Cells of a pathogen.	Pseudomonas	Pseudomonas	They travel along lymph nodes to the infected tissue.	Macrophages make antibodies that help kill bacteria.	transmigration, Monocyte, phagocytosis, Macrophage																									White blood cells cling to cells that have Selectin protein on their surface. Panel A shows cells that do not express Selectin and were washed in a solution of white blood cells. Panel B shows cells that do express Selectin and were washed in a similar solution of white blood cells. Panel C shows the same cells as in panel B, but magnified to show the white blood cells that remain on the surface …									Red	An object you need to avoid.	Red	A complex carbohydrate	Red	A protein that does not interact with Monocytes.
White Blood Cell	Monocytes	Transmigration	Monocytes	C,A,B,D		ICAM	Selectin	They exit veins at the site of inflammation and follow signals to the infection.	Macrophages track down and eat bacteria.	Moncyte, transmigration, Macrophage, phagocytosis																																		Blue	A wiggly thig you need to shoot to win.	Green	A protein	Green
Indicates memory of the image and its identity in the game	Indicates understanding that white blood cells are differentiated form each other buy their activities		Tests for understanding of fifferentiated activities. Monocytes repond first in Immune Attack.	Tests for understanding of the process, independently of vocabulary	Meant to test for understanding of level 2 activity.
Comprehension	Comprehension	Comprehension	Comprehension	Comprehension	Comprehension
14: When there is an infection near a vein, what happens?	15: What causes this change?	20: How do Macrophages hunt bacteria?	21: How do Macrophages recruit other cells to help fight an infection?	28: When there is an infection near a vein, what happens to the cells of the vein wall?	32: Why do Monocytes start rolling on vein walls?
The vein begins to make antibodies.	The vein cells cells grow bigger.	The brain releases Cytokines like C3a that help Macrophages locate the bacteria.	They send a chemical signal to the lymph nodes.	The cells make new antibodies that attack the bacteria.	Monocytes roll along vein walls when blood pressure is high.
The vein becomes sticky to red blood cells.	The vein cells make a chemical signal.	Macrophages are called to the infection by Neutrophils.	They relay a general alarm through red blood cells.	The cells make a chemical signal that attracts red blood cells.	Monocytes always roll along vein walls.
The vein becomes wider to let more white blood cells through.	Nearby cells make new protein.	T-Cells guide Macrophages to the infection.	They send a chemical signal that activates carrier proteins.	The cells become more rigid, keeping the infection out of the bloodstream.	Because some veins are very small.
The vein starts attracting Monocytes.	The vein cells make new protein on their surface.	Macrophages follow the C3a signal that diffuses away from the bacteria.	They send a hemical signal that certain cells can follow.	The cells change their surfaces so that they become sticky to white blood cells.	Because some veins walls make proteins that stick to Monocytes.
Test of understanding of the fact the the vein surfaces change in response to the infection	Test of understanding of the fact the the vein surfaces change, that new proteins on their surfaces cause the Monocyte to stick.
Applied	Applied	Applied	Applied	Applied	Applied	Applied	Applied	Applied	Applied
35: Which of the following would be seen on normal healthy vein cells?	36: A monocyte rolls along the vein wall, but does not stop to transmigrate. What went wrong?	37: If a Macrophage had no LPS Receptors what would happen?	38: If a patient has no Selectin proteins in their body, what would their symptoms be?	39: If you learned that the plastic bottle factory next door was making a chemical that acts like C3a, would you be worried?	40: What might happen if a cell is missing one kind of protein?	41: If a person was missing Selectin protein on her veins, what would help her?	42: What makes macrophages different from T-cells?	43: Macrophages track down bacteria and T-Cells do not. Why are they act differently?	44: If a patient is missing the chemical signal C3a, what would her symptoms be?
C3a	The T-Cells sent the wrong signal.	The antibodies produced by B-Cells would be less effective.	The patient would be a mutant, but his immune system can function properly.	No, because C3a is not water soluble.	The cell may die because its ratio of cholesterol to protein is too high.	A blood transfusion to replace blood cells.	The shape of their membranes.	T-Cells and Macrophages have different DNA.	Nothing, the patient has many other kinds of chemical signals.
ICAM	The B-Cells were not activated.	The patient will be sensitive to viruses.	The patient would be fine because the antibodies still work.	Yes, because any chemical is bad.	Nothing, cells have many other kinds of proteins.	More exercise to increase antibodies.	Their DNA.	Macrophages are bigger than T-Cells.	The patient’s connective tissue would be weak.
Selectin	No antibodies were produced.	The macrophage would function normally.	The patient would have T-Cells that do not function.	No, because C3a is helpful for T-Cells.	The cell will get replacement proteins from another cell.	Allergy medication to activate white blood cells.	Their ATP requirements.	Macrophages and T-Cells are not in the same veins.	The patient would exhibit inappropriate emotions.
All of the above	The Monocyte did not find an ICAM.	The macrophage would follow C3a but not eat bacteria.	The patient would not fight bacteria infections.	Yes, because more C3a might mislead Macrophages.	The cell will not be able to do certain things.	Gene therapy to replace the Selectin gene.	The proteins they have on their surfaces and insides.	T-Cells do not have LPS Receptors.	The patient would not fight bacteria infections.
None of the above
Only students who understand that vein cells express new proteins upon inflammation could answer this	Test ability to think about what the lack of one protein could cause.	Test ability to think about what the lack of one protein could cause.	Test ability to think about what the lack of one protein could cause.	Meant to test whether student can imagine a chemical mimicing a human signaling molecule.		A wild attempt to test for understanding of the fact that a replacement gene could replace a missing protein.	To test whether student knows that proteins differe among cells, while DNA is the same (for a given organism). And whether student can apply that knowledge to the case of T-Cells and Macrophages.	To test whether student knows that proteins differ among cells, while DNA is the same (for a given organism). And whether student can apply that knowledge to the case of T-Cells and Macrophages.
Game Mechanism
12: What kind of cell is this?	89: What color were the Monocytes in the Game Immune Attack?	90: What is the arrow pointing to?	91: What color were the Pseudomonas bacteria in the game Immune Attack?	92: In the above picture, what is the arrow pointing to?	93: What color are were the Neutrophils in the game Immune Attack?	94: In the above picture, what is the arrow pointing to?	95: Which color object above will make monocytes stop?	96: What is the function of this cell?	97: Please match the following pictures (1-3) with the locations below: 1 2 3
Amoeba	Green	Something that will damage your ship.	Blue	An amino acid	Yellow	A protein that stops Monocytes.	Blue	This cell makes antibodies.	Connective tissue
Bacteria cell	Yellow	A wiggly thing that is the wrong target.	Yellow	A lipid	Blue	A protein that makes Monocytes exit the blood vessel.	Purple	This cell eats viruses.	Vein interior
A skin cell	Red	An object you need to avoid.	Red	A complex carbohydrate	Red	A protein that does not interact with Monocytes.	Yellow	This cell makes antibiotics.	Cell surface
White Blood Cell	Blue	A wiggly thig you need to shoot to win.	Green	A protein	Green		Brown	This cell eats bacteria
Confidence
1. I would be able to understand this diagram if I read it and thought about it.		2. I would be able to understand this diagram if I read it and thought about it.		3. I would be able to understand this diagram if I read it and thought about it.	4. I would be able to understand this diagram if I read it and thought about it.		5. I would be able to understand this diagram if I read it and thought about it.
								Data image with legend written to match game language.
I disagree definitely. (1)		I disagree definitely. (1)		I disagree definitely. (1)	I disagree definitely. (1)		I disagree definitely. (1)
I disagree somewhat. (2)		I disagree somewhat. (2)		I disagree somewhat. (2)	I disagree somewhat. (2)		I disagree somewhat. (2)
I am neutral. (3)		I am neutral. (3)		I am neutral. (3)	I am neutral. (3)		I am neutral. (3)
I agree somewhat. (4)		I agree somewhat. (4)		I agree somewhat. (4)	I agree somewhat. (4)		I agree somewhat. (4)
I agree definitely. (5)	Transmigration	I agree definitely. (5)	Yellow Macrophages	I agree definitely. (5)	I agree definitely. (5)		I agree definitely. (5)
				Neurons	Nuclear pore
		Janeway
		Immununobiology
					http://www.ncbi.nlm.nih.gov/books/NBK21649/figure/A2924/?report=objectonly
					Figure 11-28a
					Molecular Cell Biology. 4th edition.
					Lodish H, Berk A, Zipursky SL, et al.
					New York: W. H. Freeman; 2000.
					Figure 11-28Nuclear pore complex
					(a) Nuclear envelopes of Xenopus oocytes visualized by field emission in-lens scanning electron microscopy. Left: Cytoplasmic face of nuclear pore complexes (NPCs).Middle: Nucleoplasmic face of NPCs, showing the “basket” structure. Right: Nucleoplasmic face of the nuclear envelope after removal of the nuclear membrane by mild detergent treatment. The nuclear lamin network, which inserts into the …
				http://www.1cro.com/mcb/bv.fcgi@call=bv.view..showsection&rid=mcb.figgrp.d1e101148.htm
				© 2000 by W. H. Freeman and Company. All rights reserved.
				Molecular Cell Biology Chapter 21. Nerve Cells Section 21.1. Overview of Neuron Structure and Function
				Figure 21-1. Structure of typical mammalian neurons. Arrows indicate the direction of conduction of action potentials in axons (red). (a) Multipolar interneurons. Each has profusely branched dendrites, which receive signals at synapses with several hundred other neurons, and a single long axon that branches laterally and at its terminus. (b) A motor neuron that innervates a muscle cell. Typically…
[truncated: 3 more columns]
